# Supplementary material
Source: PubMed Central journal article supplement (PMC3659938)
Supplement: supp_2012.067447_2012_067447-Contributions.pdf [file supp_2012.067447_2012_067447-Contributions.pdf]

**Manuscript no. HAEMATOL/2012/067447 entitled “Bone metabolism, growth rate and pubertal development in children with chronic myeloid leukemia treated with imatinib during puberty“**

**Authors: Fiorina Giona, Stefania Mariani, Lucio Gnessi, Maria Luisa Moleti, Massimiliano Rea, Annalisa De Vellis, Deborah Marzella, Anna Maria Testi and Robin Foà**

**Information about the contributions of each person named as having participated in the study**

**1) Guarantor, i.e., person who is responsible for the integrity of the work as a whole:**

- Fiorina Giona, MD, Hematology, Department of Cellular Biotechnologies and Haematology, "Sapienza" University of Rome. E-mail: [giona@bce.uniroma1.it](mailto:giona@bce.uniroma1.it), [fiorinagiona@gmail.com](mailto:fiorinagiona@gmail.com)

The guarantor of this manuscript confirms that all persons designated as authors qualify for authorship, and that each author has participated sufficiently in the work to take public responsibility for appropriate portions of the content.

**2) Authors who participated in the conception of the study: Fiorina Giona, Lucio Gnessi**

**3) Design & Methods. The following authors were responsible for specific investigations:**

- Fiorina Giona was responsible for patient selection, management and monitoring
- Massimiliano Rea and Annalisa De Vellis were responsible for samples and data collection
- Stefania Mariani and Lucio Gnessi performed biomarkers of skeletal homeostasis and hormonal markers
- Maria Luisa Moleti and Anna Maria Testi were responsible for monitoring patients

**4) Results. The following authors were responsible for specific portions of the results, including figures and tables:**

- The results were generated by Fiorina Giona, Lucio Gnessi and Stefania Mariani
- Fiorina Giona and Deborah Marzella were responsible for Figure 1
- Fiorina Giona, Deborah Mrzella and Stefania Mariani were responsible for Figure 2 and on-line supplementary Tables

**5) Writing the manuscript. The following authors were responsible for writing the manuscript:**

- Fiorina Giona was responsible for writing and revising the manuscript
- Stefania Mariani, Lucio Gnessi, Luisa Moleti and Robin Foà were responsible for critically revising the manuscript

**6) Contributors Listed in Acknowledgments: Not applicable**
